# Supplementary material for: Toward a scalable framework for reproducible processing of volumetric, nanoscale neuroimaging datasets
Source: PubMed Central journal article supplement (PMC7751400; doi:10.1093/gigascience/giaa147), 2020-12-21
Supplement: giaa147_response_to_reviewer_comments_revision_1.pdf [file giaa147_response_to_reviewer_comments_revision_1.pdf]

## Author's Response To Reviewer Comments

Close

We have made the required changes from the reviewers, and checked to change minor formatting and typo errors as well.

Close
